# Supplementary material for: Preparation and certification of natural and 82Se-labelled selenomethionine reference materials
Source: Royal Society of Chemistry journal article supplement (doi:10.1039/d0ja00411a), 2021-01-01
Supplement: d0ja00411a2.pdf [file d0ja00411a2.pdf]

Supplementary Information (Part 2) for:

**Preparation and Certification of Natural and <sup>82</sup>Se-Labelled Selenomethionine Reference Materials**

Kelly L. LeBlanc\*, Phuong-Mai Le, Juris Meija, Jianfu Ding, Jeremy E. Melanson, Zoltán Mester

National Research Council Canada, 1200 Montreal Road, Ottawa, Ontario, Canada

\*Corresponding Author Email: [Kelly.LeBlanc@nrc-cnrc.gc.ca](mailto:Kelly.LeBlanc@nrc-cnrc.gc.ca)

## Total Ion Chromatogram – SEES-1

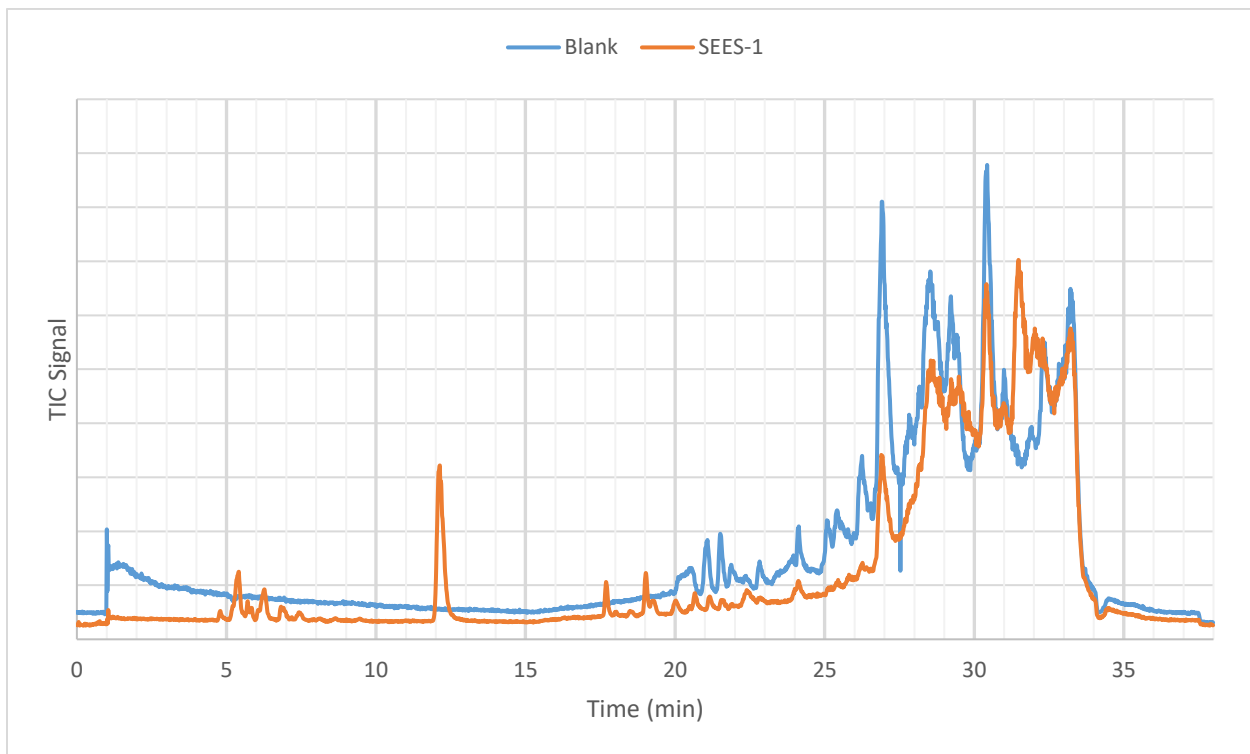

**Figure S1:** Total ion chromatogram ( $m/z$  50 to 500) for a blank solution (deionized water) and for a SEES-1 standard solution of approximate concentration  $25 \mu\text{g g}^{-1}$  ( $\sim 10 \mu\text{g Se g}^{-1}$ )

# Selenomethionine

## 12.14 min (SeMet)

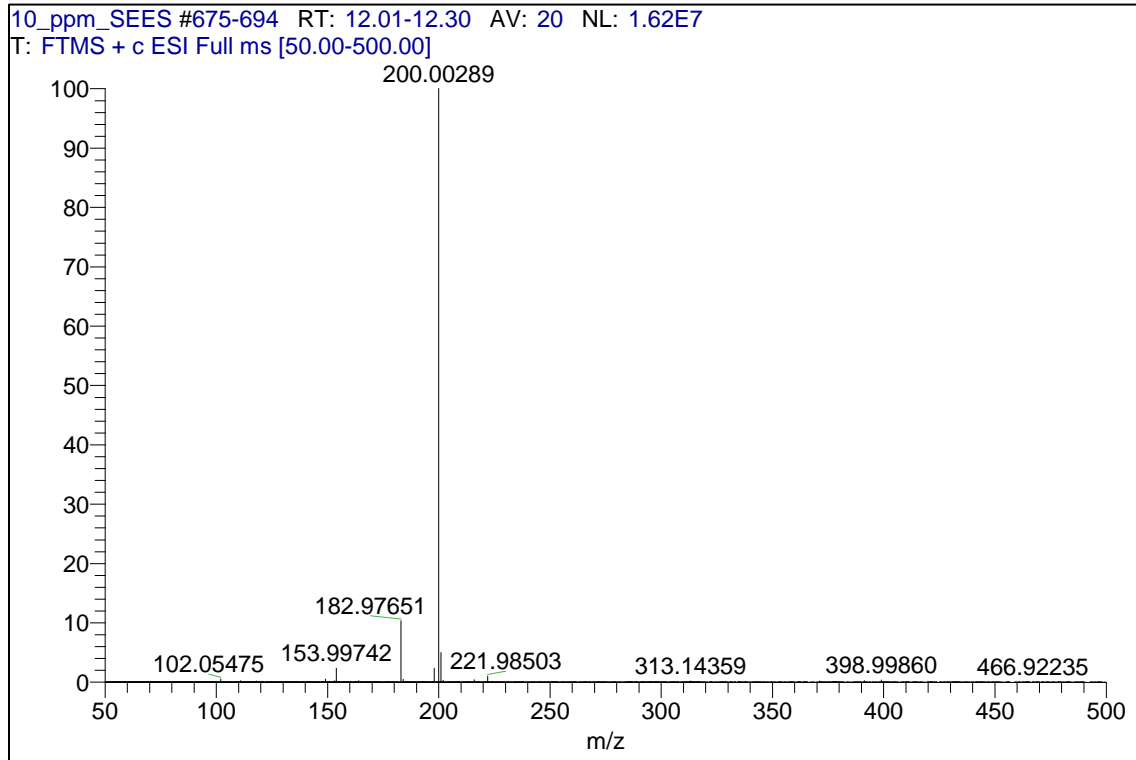

Figure S2: Mass spectrum, full scan from 12.01 min to 12.30 min

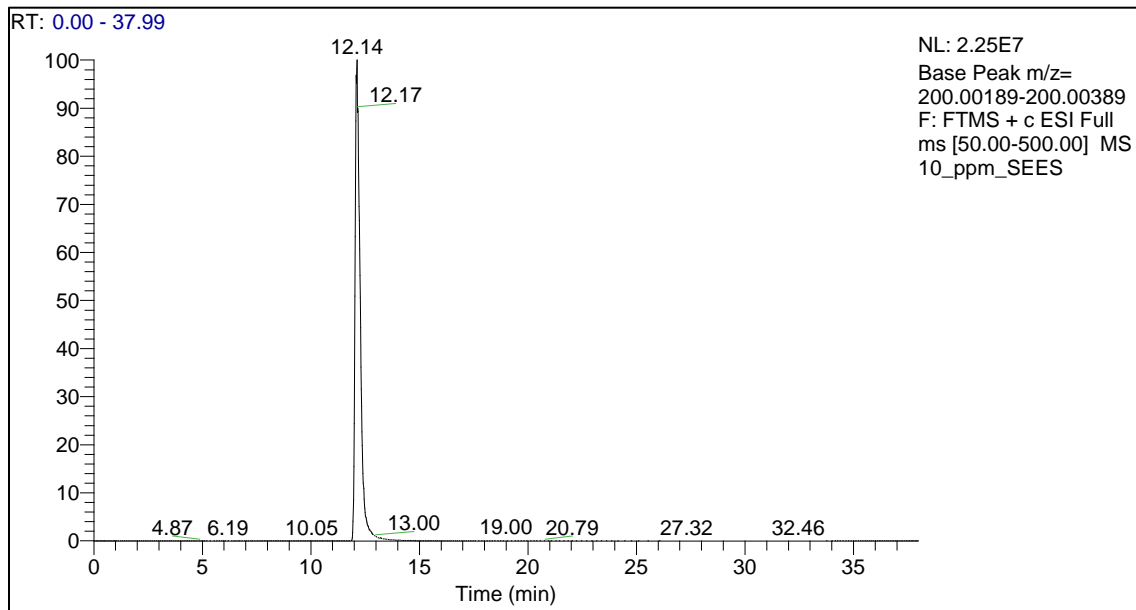

Figure S3: Extracted ion chromatogram for  $m/z$  200

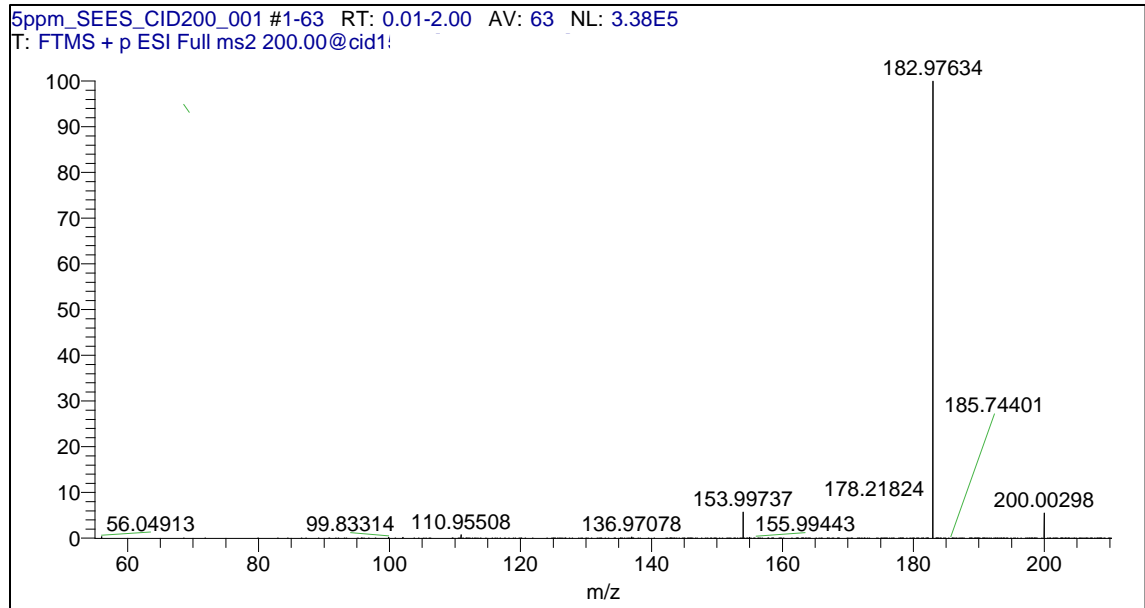

**Figure S4:** Collision induced dissociation of  $m/z$  200, infusion of SEES-1 for (2 minute scan time)

**Peak Identification:**

|           |           |                                                  |
|-----------|-----------|--------------------------------------------------|
| Full Scan | 200.00289 | $C_5H_{12}NO_2^{82}Se^+$ (-0.326 ppm)            |
|           | 182.97651 | $C_5H_9O_2^{82}Se^+$ (0.568 ppm)                 |
| CID (200) | 200.00298 | $C_5H_{12}NO_2^{82}Se^+$ (0.124 ppm)             |
|           | 182.97634 | $C_5H_9O_2^{82}Se^+$ (-0.361 ppm) (-17 amu, -OH) |

**Impurity: 5.40 min Peak**

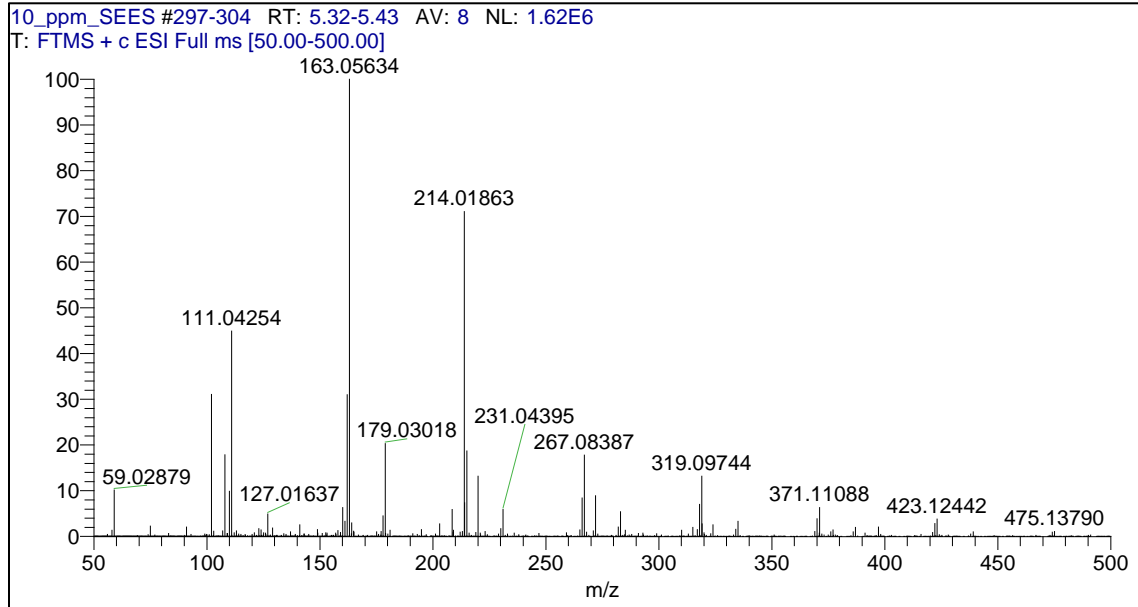

**Figure S5:** Mass spectrum, full scan from 5.32 min to 5.43 min

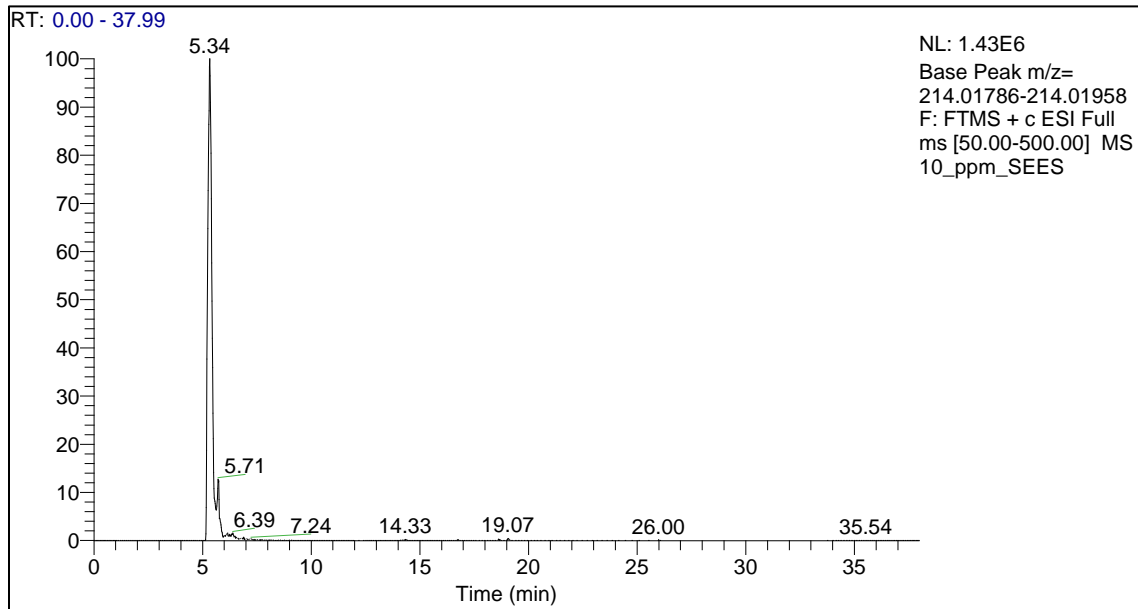

**Figure S6:** Extracted ion chromatogram for  $m/z$  214

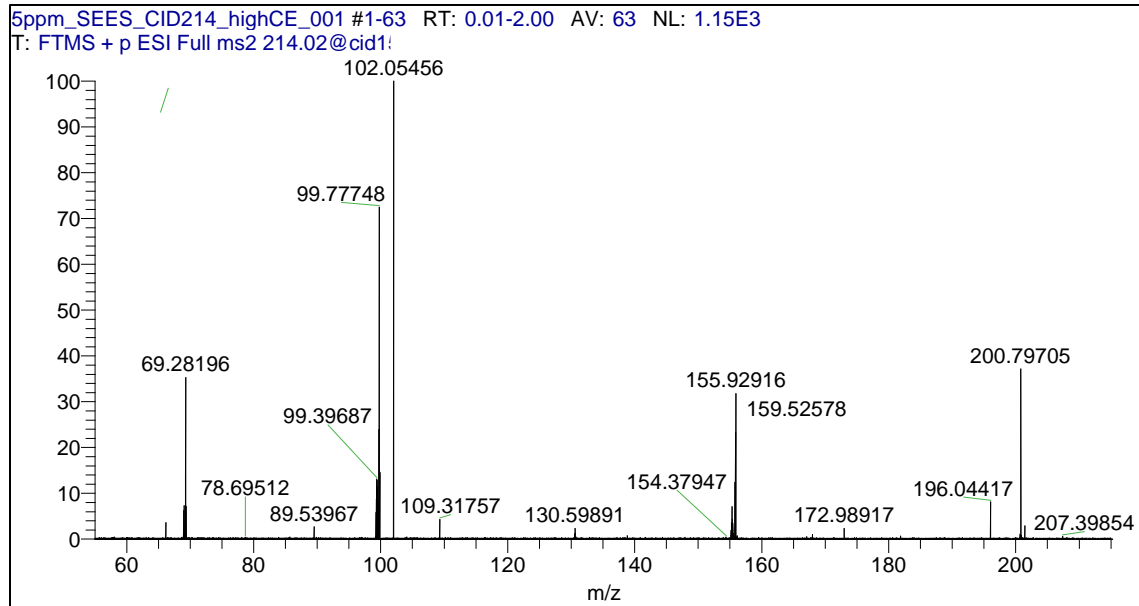

**Figure S7:** Collision induced dissociation of  $m/z$  214, infusion of SEES-1 for (2 minute scan time)

**Peak Identification**

Full Scan      214.01863       $C_6H_{14}NO_2^{82}Se^+$  (0.116 ppm)

CID

**Impurity: 5.83 min Peak**

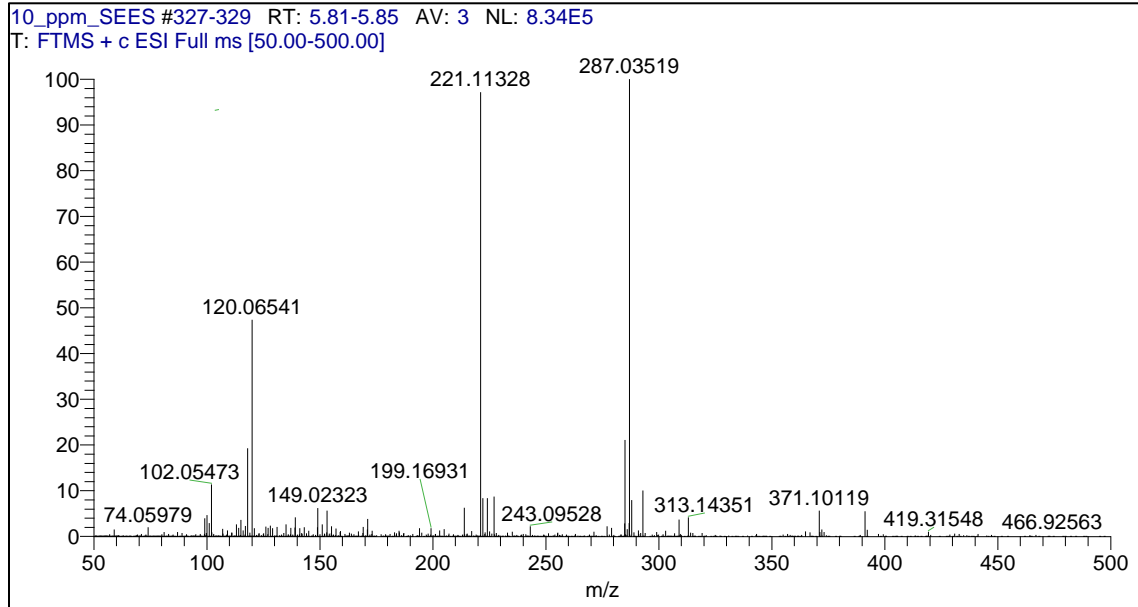

**Figure S8:** Mass spectrum, full scan from 5.81 min to 5.85 min

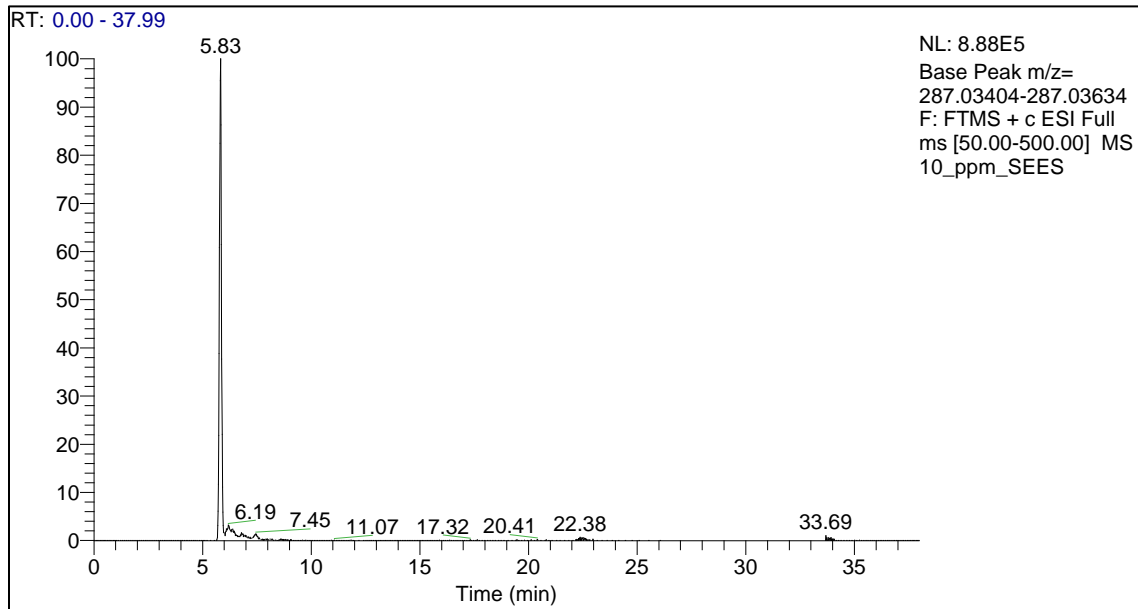

**Figure S9:** Extracted ion chromatogram for m/z 287

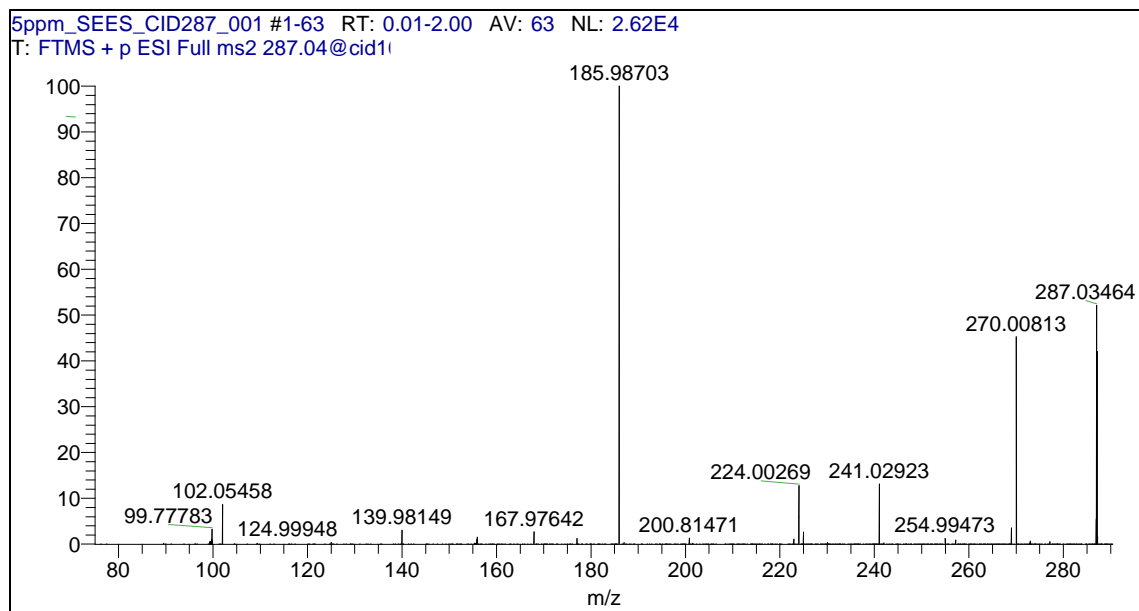

**Figure S10:** Collision induced dissociation of  $m/z$  287, infusion of SEES-1 for (2 minute scan time)

### Peak Identification

|           |           |                                                                  |
|-----------|-----------|------------------------------------------------------------------|
| Full Scan | 287.03519 | $C_8H_{17}N_2O_4^{82}Se^+$ (0.719 ppm)                           |
| CID       | 287.03464 | $C_8H_{17}N_2O_4^{82}Se^+$ (-1.197 ppm)                          |
|           | 185.98703 | $C_4H_{10}NO_2^{82}Se^+$ (-1.479 ppm) (-101 amu, $-C_4H_7NO_2$ ) |



**Impurity: 6.89 min Peak**

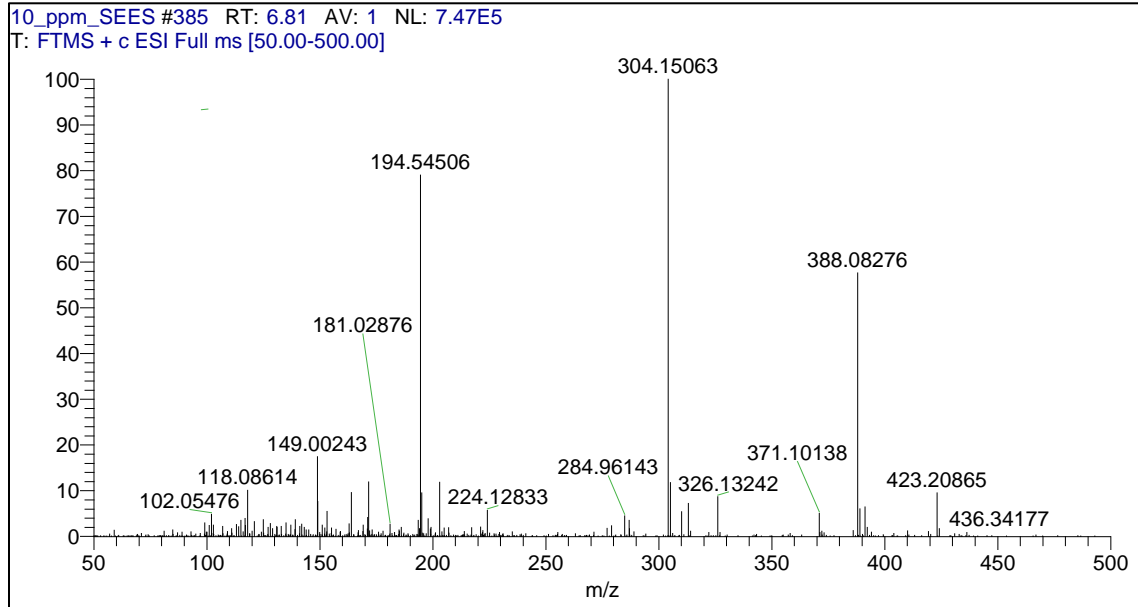

**Figure S11:** Mass spectrum, full scan at 6.81 min

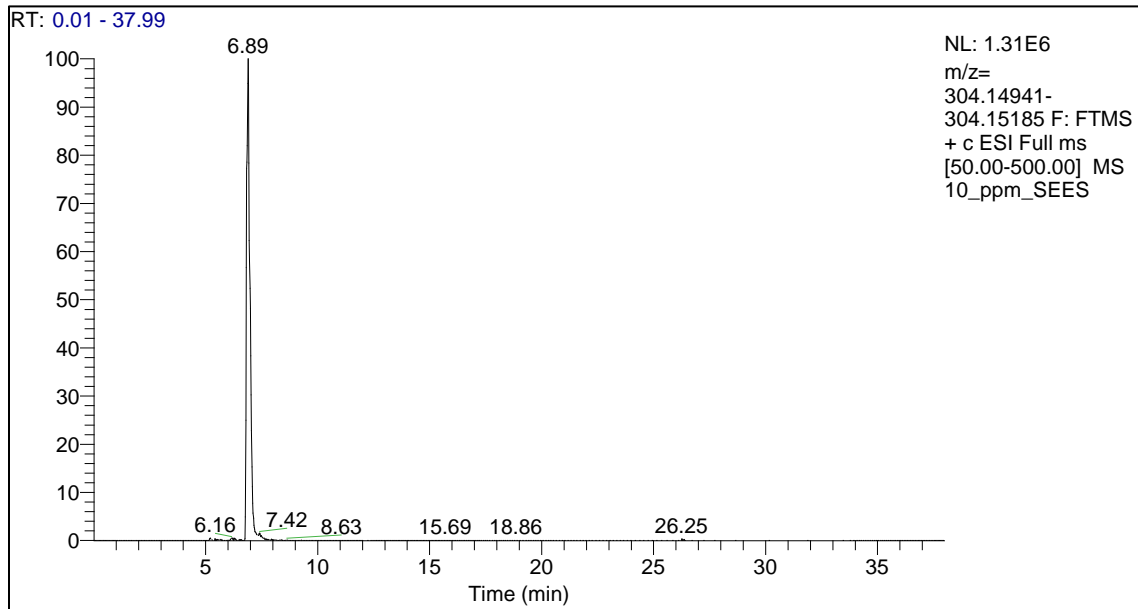

**Figure S12:** Extracted ion chromatogram for  $m/z$  304

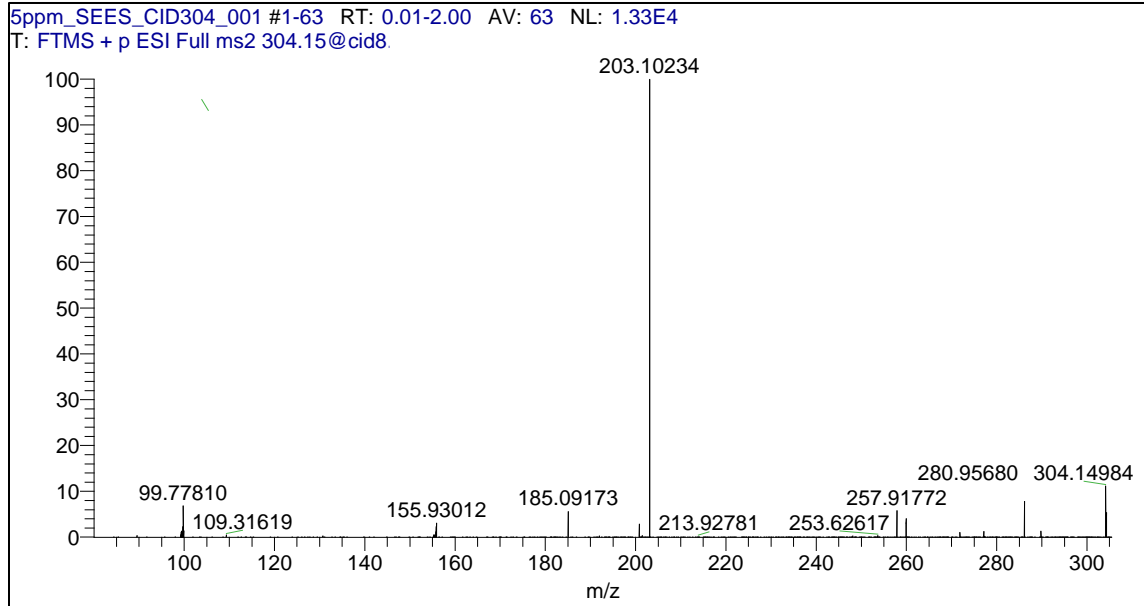

**Figure S13:** Collision induced dissociation of  $m/z$  304, infusion of SEES-1 for (2 minute scan time)

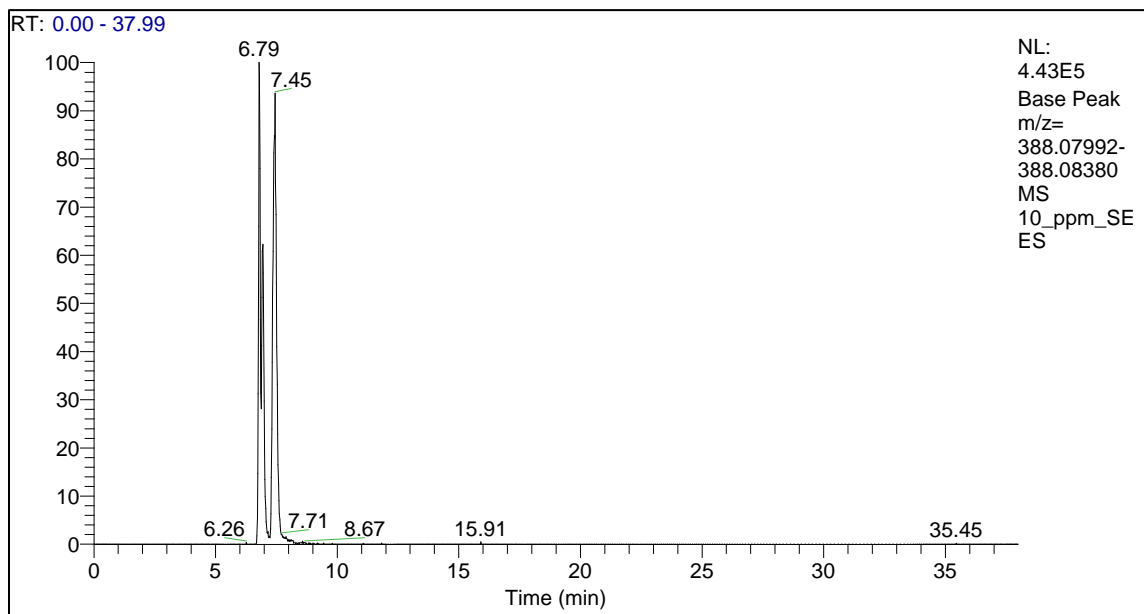

**Figure S14:** Extracted ion chromatogram for  $m/z$  388

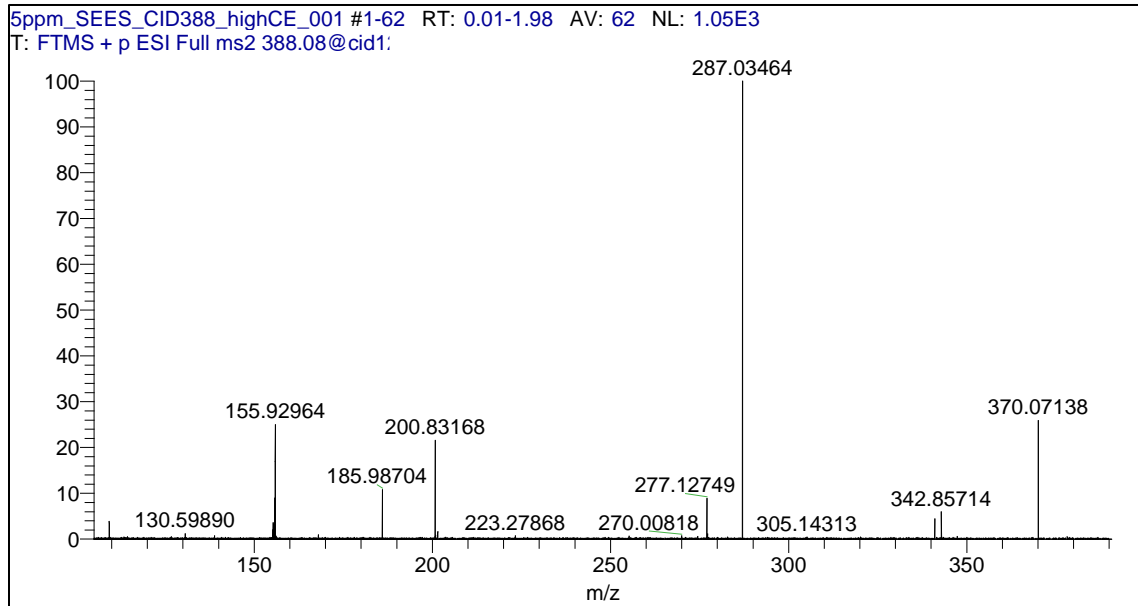

**Figure S15:** Collision induced dissociation of  $m/z$  388, infusion of SEES-1 for (2 minute scan time)

### Peak Identification

|           |           |                                                                       |
|-----------|-----------|-----------------------------------------------------------------------|
| Full Scan | 388.08276 | $C_{12}H_{24}N_3O_6^{82}Se^+$ (0.256 ppm)                             |
|           | 304.15063 | $C_{16}H_{30}^{82}Se^+$ (-0.896 ppm)                                  |
| CID (304) | 304.14984 | $C_{16}H_{30}^{82}Se^+$ (-3.493 ppm)                                  |
|           | 203.10234 | $C_9H_{13}^{82}Se^+$ (413 ppm!!) (-101 amu, $-C_7H_{17}$ )            |
| CID (388) | 388.08186 | $C_{12}H_{24}N_3O_6^{82}Se^+$ (-2.066 ppm)                            |
|           | 370.07138 | $C_{20}H_{22}N_3O_5^{82}Se^+$ (-1.992 ppm) (-18 amu, $-H_2O$ )        |
|           | 278.03464 | $C_8H_{17}N_2O_4^{82}Se^+$ (-1.092 ppm) (-101 amu, $-C_4H_7NO_2$ )    |
|           | 185.98704 | $C_4H_{10}NO_2^{82}Se^+$ (-1.425 ppm) (-202 amu, $-C_8H_{14}N_2O_4$ ) |

**Impurity: 7.45 min Peak**

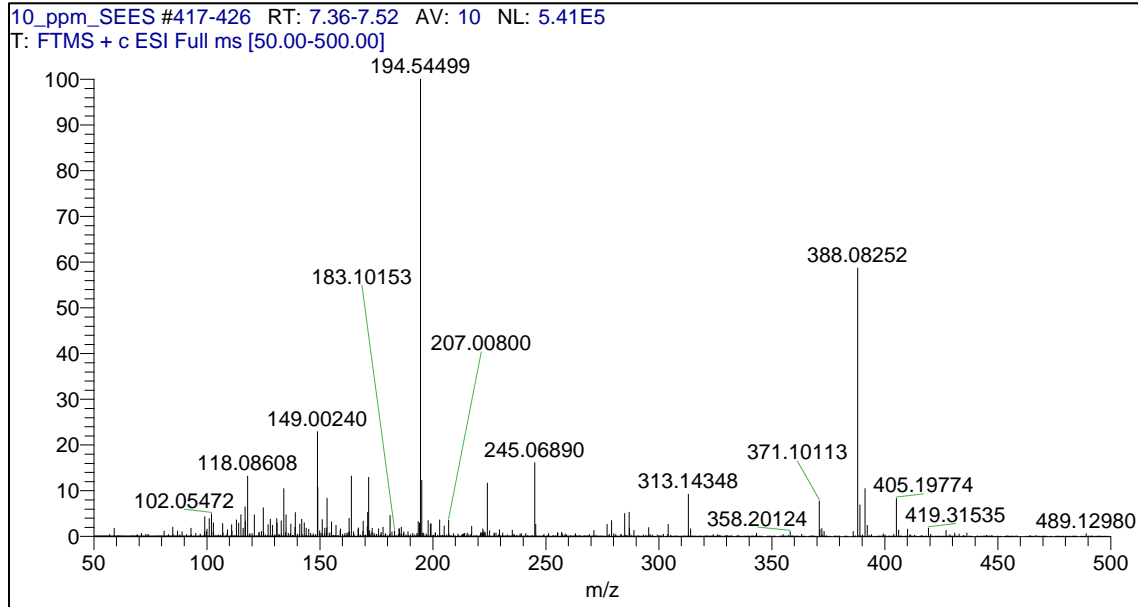

**Figure S16:** Mass spectrum, full scan from 7.36 min to 7.52 min

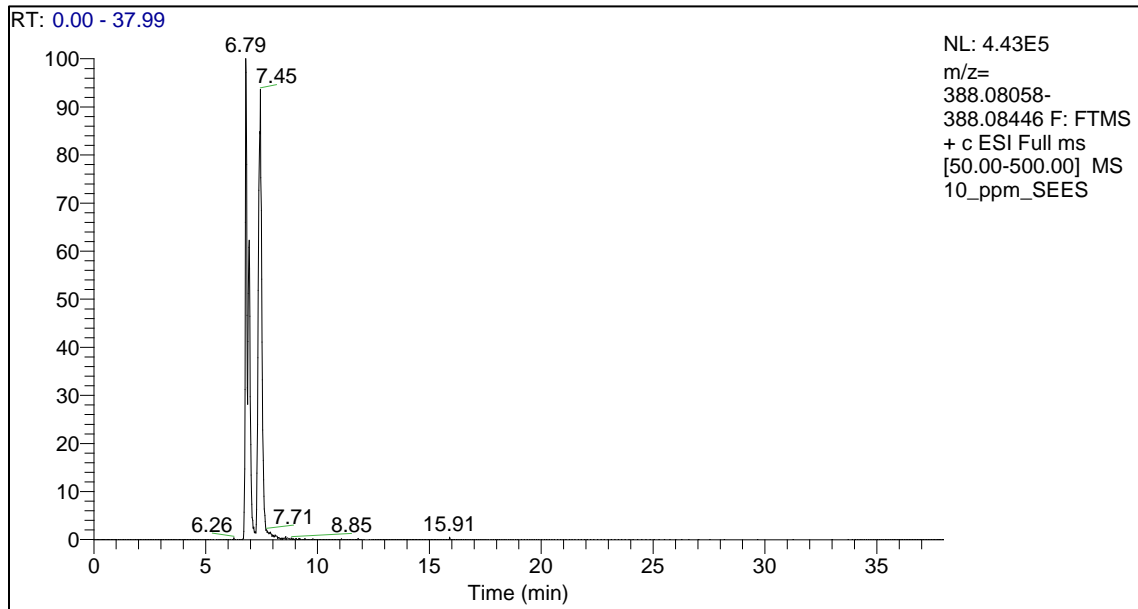

**Figure S17:** Extracted ion chromatogram for  $m/z$  388

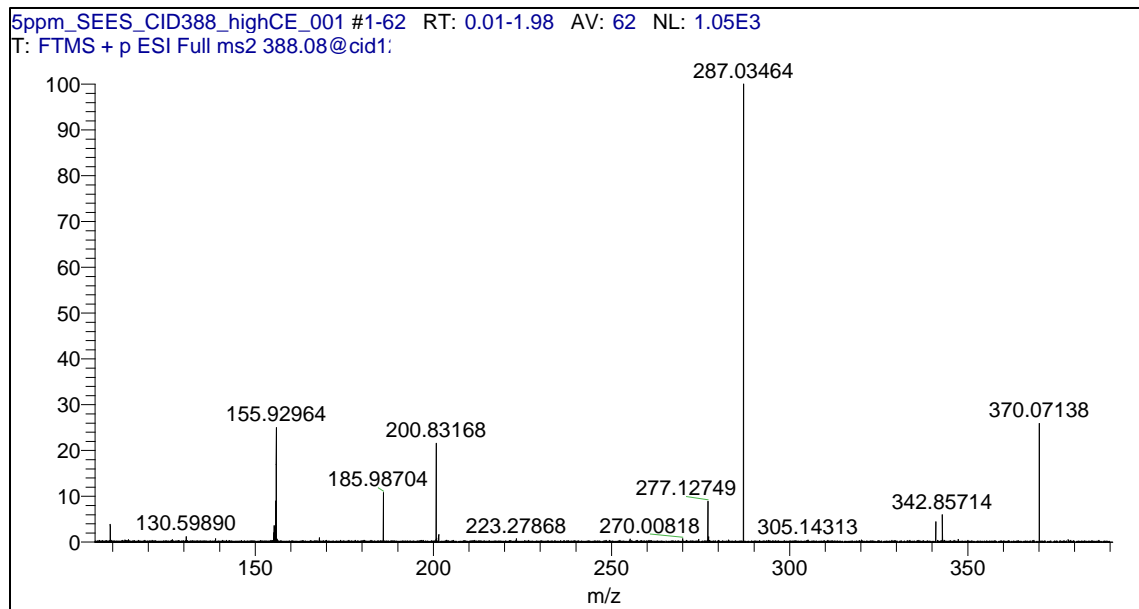

**Figure S18:** Collision induced dissociation of  $m/z$  388, infusion of SEES-1 for (2 minute scan time)

### Peak Identification

|           |           |                                                                       |
|-----------|-----------|-----------------------------------------------------------------------|
| Full Scan | 194.54500 | $C_{12}H_{25}N_3O_6^{82}Se^{2+}$ (0.158 ppm)                          |
|           | 388.08252 | $C_{12}H_{24}N_3O_6^{82}Se^+$ (0.256 ppm)                             |
| CID (388) | 388.08186 | $C_{12}H_{24}N_3O_6^{82}Se^+$ (-2.066 ppm)                            |
|           | 370.07138 | $C_{20}H_{22}N_3O_5^{82}Se^+$ (-1.992 ppm) (-18 amu, $-H_2O$ )        |
|           | 278.03464 | $C_8H_{17}N_2O_4^{82}Se^+$ (-1.092 ppm) (-101 amu, $-C_4H_7NO_2$ )    |
|           | 185.98704 | $C_4H_{10}NO_2^{82}Se^+$ (-1.425 ppm) (-202 amu, $-C_8H_{14}N_2O_4$ ) |

**Impurities: 17.69 min & 19.02 Min Peaks**

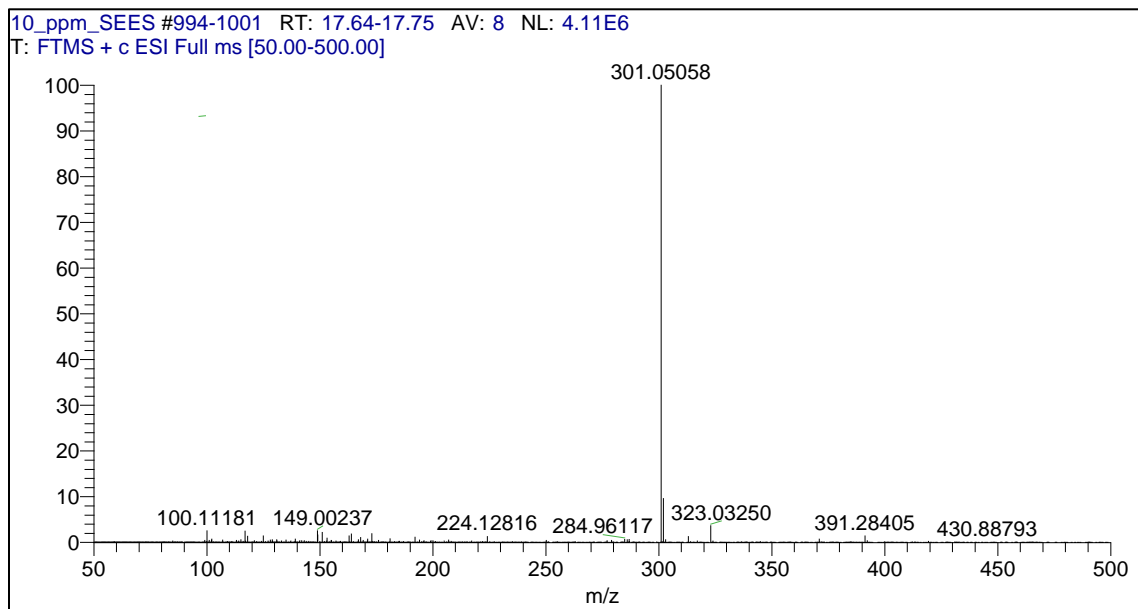

**Figure S19:** Mass spectrum, full scan from 17.69 min to 17.75 min

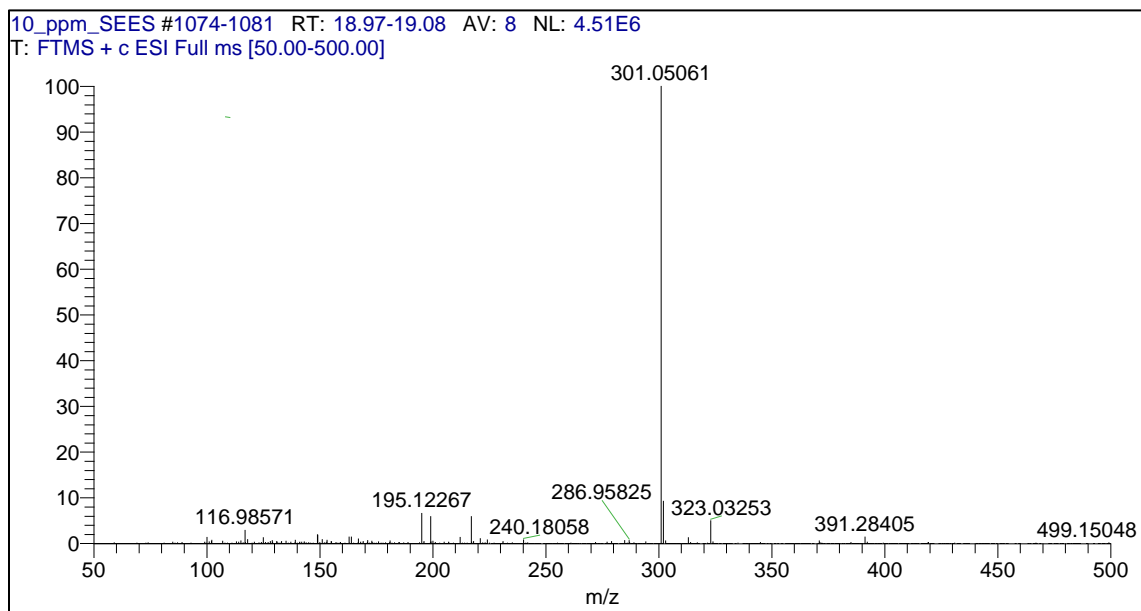

**Figure S20:** Mass spectrum, full scan from 18.97 min to 19.08 min

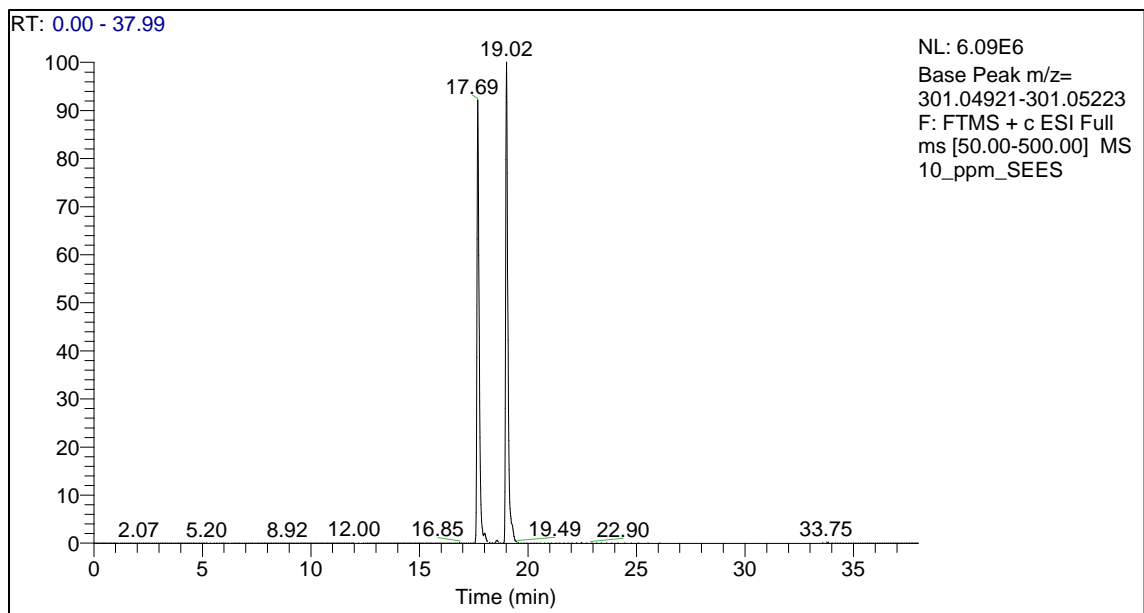

Figure S21: Extracted ion chromatogram for  $m/z$  301

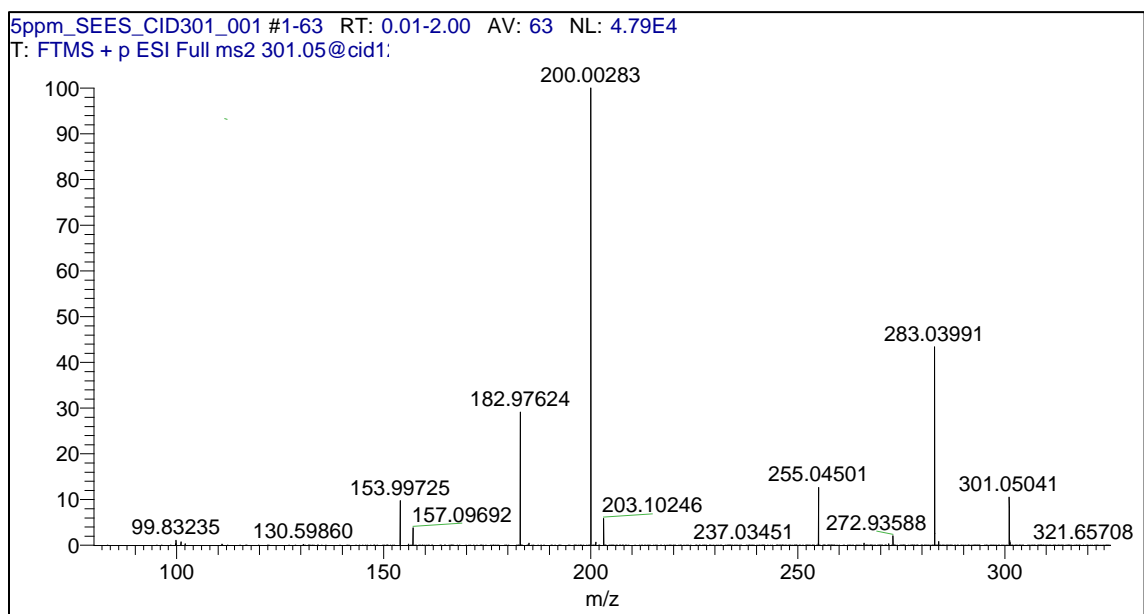

Figure S22: Collision induced dissociation of  $m/z$  301, infusion of SEES-1 for (2 minute scan time)

## Peak Identification

|           |           |                                                                  |
|-----------|-----------|------------------------------------------------------------------|
| Full Scan | 301.05058 | $C_9H_{19}N_2O_4^{82}Se^+$ (-0.178 ppm, 17.7 min)                |
|           | 301.05061 | $C_9H_{19}N_2O_4^{82}Se^+$ (-0.078 ppm, 19.0 min)                |
| CID       | 301.05041 | $C_9H_{19}N_2O_4^{82}Se^+$ (-0.743 ppm)                          |
|           | 283.03991 | $C_9H_{17}N_2O_3^{82}Se^+$ (-0.561 ppm) (-18 amu, $-H_2O$ )      |
|           | 255.04501 | $C_8H_{17}O_2N_2^{82}Se^+$ (-0.566 ppm) (-46 amu, $-CH_2O_2$ )   |
|           | 200.00283 | $C_5H_{12}NO_2^{82}Se^+$ (-0.626 ppm) (-101 amu, $-C_4H_7NO_2$ ) |
|           | 182.97624 | $C_5H_9O_2^{82}Se^+$ (-0.908 ppm) (-118 amu, $-C_4H_{10}NO_2$ )  |
